# Supplementary material
Source: PubMed Central journal article supplement (PMC8654267)
Supplement: NIHMS1750030-supplement-Supplementary_Information.pdf [file NIHMS1750030-supplement-Supplementary_Information.pdf]

---

**Supplementary information**

---

**An inflammatory aging clock (iAge) based on deep learning tracks multimorbidity, immunosenescence, frailty and cardiovascular aging**

---

In the format provided by the authors and unedited

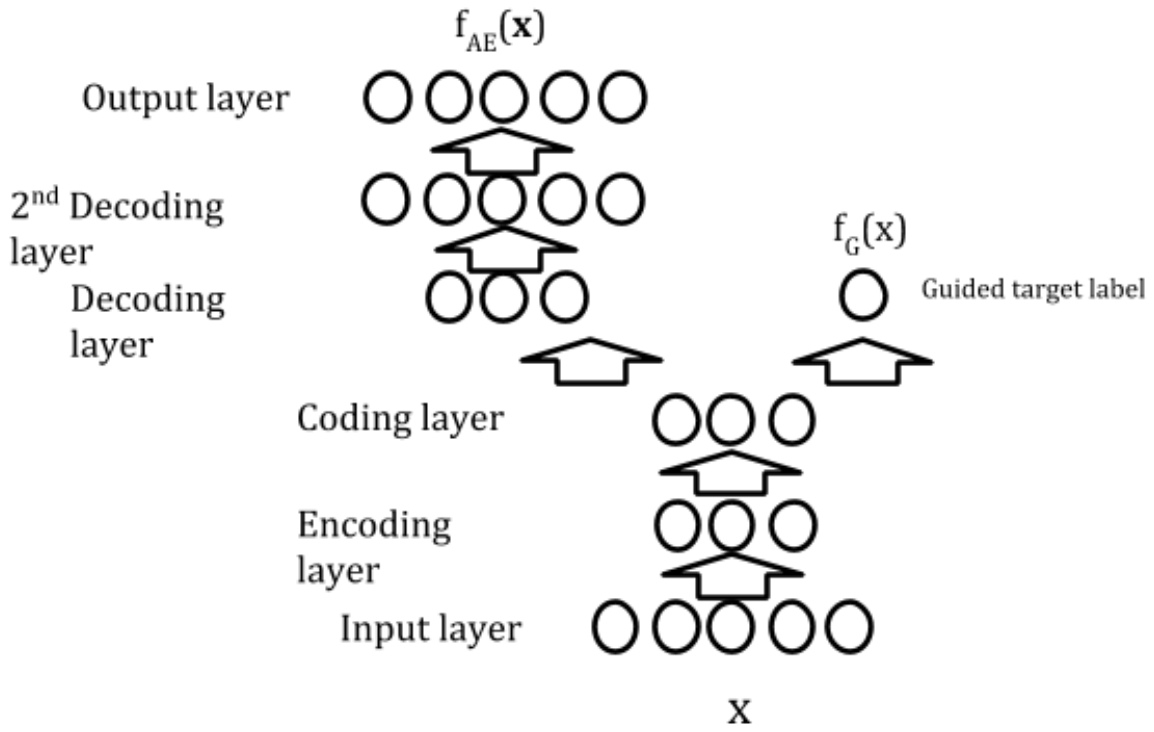

1  
 2 **Supplementary Figure 1. guided-auto-encoder with depth 2 and width 3.**

3  
 4  
 5  
 6

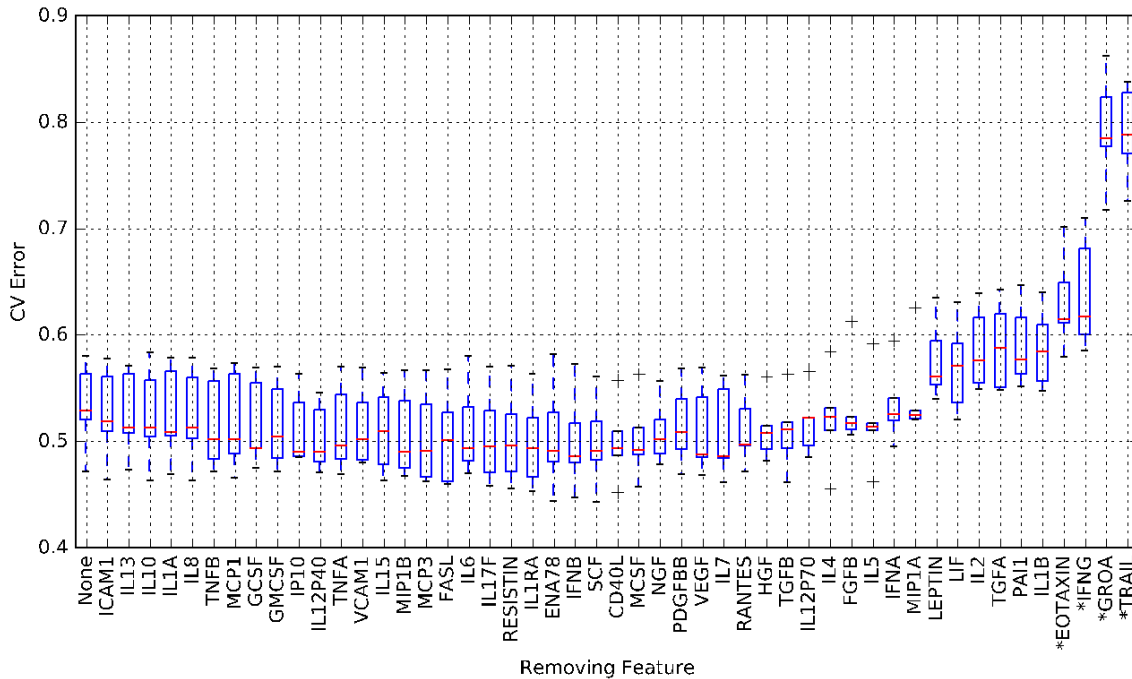

7

8 **Supplementary Figure 2. Cross-validation feature importance selection for prediction of the**  
 9 **inflammatory clock (iAge).** We estimated the minimum set of features able to predict iAge. From  
 10 the left to right, each box represents the 5-fold cross-validation errors for a set of features. The  
 11 leftmost feature ("None") represents no feature was removed, hence we use all features to predict  
 12 iAge. Moving from left to right, each box represents the 5-fold cross-validation errors removing  
 13 one feature at a time (with feature name as shown in the x axis) based on their importance derived  
 14 from the analysis of the jacobians (low importance feature removed first). With removal of each  
 15 feature, a p-value (two sample t-test) on the cross-validation errors between current feature set and  
 16 all-feature-set ("None") is computed. Removal of most features does not significantly affect  
 17 prediction accuracy. The cross-validation error using only 5 features (EOTAXIN, IFNG, GROA,  
 18 TRAIL and CXCL9 (which is not removed as it is the last feature)), is not significantly different  
 19 from the error obtained using all features, indicating that iAge can also be predicted with this  
 20 reduced set, as accurately as using all 50 features. Boxes represent 25th and 75th percentile around  
 21 the median (red line); whiskers, 1.5× interquartile range).

22

23

24

|    | Group 1<br>(25 to 44 y)  | Group 2<br>(45 to 59y) | Group 3<br>(60 to 74 y) | Group 4<br>(75 to 90 y) | P           | 25      |    |
|----|--------------------------|------------------------|-------------------------|-------------------------|-------------|---------|----|
| 26 | N                        | 21                     | 32                      | 25                      | 19          | -       | 27 |
|    | Age (mean)               | 33± 6                  | 53 ± 4                  | 68 ± 4                  | 82 ± 4      | <0.001  | 28 |
|    | Female (%)               | 48                     | 50                      | 72                      | 47          | 0.25    | 29 |
|    | SBP (mmHg)               | 117 ± 12               | 118 ± 12                | 117 ± 14                | 123 ± 16    | 0.36    | 30 |
|    | DBP (mmHg)               | 71 ± 6                 | 74 ± 9                  | 71 ± 9                  | 69 ± 10     | 0.35    | 31 |
|    | Heart rate               | 64 ± 9                 | 58 ± 8                  | 65 ± 12                 | 62 ± 12     | 0.07    | 32 |
|    | BMI (kg/m <sup>2</sup> ) | 24 ± 3                 | 25 ± 3                  | 24 ± 3                  | 23 ± 3      | 0.02*   | 33 |
|    | Waist (cm)               | 83 ± 10                | 88 ± 9                  | 85 ± 8                  | 89 ± 13     | 0.23    | 34 |
|    | Glucose (mM)             | 4.9 ± 0.4              | 5.1 ± 0.6               | 5.0 ± 0.5               | 5.1 ± 0.5   | 0.20    | 35 |
|    | TC/HDL                   | 3.7 ± 1.4              | 3.4 ± 1.1               | 3.2 ± 0.9               | 3.0 ± 0.7   | 0.28    | 36 |
|    | Uric Acid                | 5.6 ± 1.6              | 5.0 ± 0.97              | 4.8 ± 1.0               | 5.7 ± 1.7   | 0.14    | 37 |
| 38 | Calcium                  | 9.3 ± 0.3              | 9.2 ± 0.4               | 9.3 ± 0.4               | 9.2 ± 0.3   | 0.99    | 40 |
|    | TSH                      | 1.60 ± 0.80            | 1.50 ± 0.60             | 2.0 ± 0.8               | 2.0 ± 0.9   | 0.108   | 41 |
|    | SCr (mg/dL)              | 0.80 ± 0.12            | 0.83 ± 0.12             | 0.80 ± 0.13             | 0.85 ± 0.18 | 0.54    | 42 |
|    | Cystatin C               | 0.80 ± 0.14            | 0.85 ± 0.15             | 0.94 ± 0.16             | 1.08 ± 0.16 | < 0.001 | 43 |
|    | Hs-CRP                   | 1.3 ± 1.3              | 1.7 ± 2.7               | 1.5 ± 1.8               | 1.1 ± 0.8   | 0.68    | 44 |

45 **Supplementary Table 1. Validation study. Baseline clinical and demographic data.**

46

47  
48  
49  
50  
51  
52  
53  
54  
55  
56  
57  
58  
59  
60  
61  
62

**Supplementary Table 2**

|                                   | <i># Features</i> | <i>Sample size</i> |
|-----------------------------------|-------------------|--------------------|
| Cell subsets                      | <b>25</b>         | <b>935</b>         |
| Immune proteins                   | <b>50</b>         | <b>1001</b>        |
| Gene expression*                  | <b>6149</b>       | <b>394</b>         |
| Cell stimulations                 | <b>84</b>         | <b>818</b>         |
| Latent CMV                        | <b>1</b>          | <b>748</b>         |
| BMI                               | <b>1</b>          | <b>724</b>         |
| Clinical questionnaire            | <b>57</b>         | <b>902</b>         |
| <u>Cardiovascular phenotyping</u> | <b>37</b>         | <b>97</b>          |

\*low variant genes removed

**Supplementary Table 2. Available data for the 1000 Immunomes Project.**

63  
64  
65

**Supplementary Table 3**

| <b>Predictors</b>                     | <b>N Subjects</b>           | <b>Total Analytes</b>                                          | <b>Outcome</b>                                                                                                                                                                     | <b>Ref</b> |
|---------------------------------------|-----------------------------|----------------------------------------------------------------|------------------------------------------------------------------------------------------------------------------------------------------------------------------------------------|------------|
| GWAS, polygenic risk score (lifespan) | 1 million                   | Genome wide genetic variants                                   | validated 7 previously identified loci and 5 novel loci in relations to difference in lifespan. Predicted accuracy of age with MAE of 5 years.                                     | 1          |
| GWAS (healthspan)                     | 300,447 British individuals | Genome wide genetic variants                                   | 12 loci associated with healthspan, or disease-free survival.                                                                                                                      | 2          |
| DNA Methylation                       | 656                         | 450,000 CpG markers                                            | predict a person's age with RMSE of 3.88 years and risk of mortality. measured age in many human tissues                                                                           | 3          |
| DNA Methylation                       | 8,000                       | 21,369 CpG sites                                               | Final model of 353 CpG sites predict a person's risk of mortality and cancer. Prediction of age has a median absolute error of 3.6 years.                                          | 4, 5       |
| DNA Methylation (DNAm PhenoAge)       | 9,926                       | Phenotypic aging measures + 20,169 CpG sites                   | risks for an array of diverse outcomes across multiple tissues and cells. Association with all-cause mortality, cancers, healthspan, physical functioning, and Alzheimer's disease | 6          |
| DNA methylation (GrimAge)             | 2356                        | 88 plasma proteins + selected subset of CpG sites from 450,000 | predictive of time-to-death, time-to-coronary heart disease, time-to-cancer                                                                                                        | 7          |
| Transcriptomics                       | 11,908                      | whole-blood gene expression                                    | 1,497 genes were significant associated with blood pressure, cholesterol levels, fasting glucose, and body mass index. Predicted age with MAE of 7.8 years.                        | 8          |
| Transcriptomics                       | 7682                        | 7,682 common genes                                             | High accuracy of actual age bin prediction with MAE of 6.19 years on the test set                                                                                                  | 9          |

|                                      |                    |                                                          |                                                                                                                                                                                                   |    |
|--------------------------------------|--------------------|----------------------------------------------------------|---------------------------------------------------------------------------------------------------------------------------------------------------------------------------------------------------|----|
| microRNA                             | 5221               | whole-blood microRNA expression                          | 127 microRNAs that were differentially expressed by age. The correlation between miRNA predicted age (miRNA age) and chronological age was significant ( $r = 0.70$ ; $P < 1 \times 10^{-320}$ ). | 10 |
| Proteomics                           | 677                | 1,129 SOMAmers                                           | Eleven proteins were associated with chronological age                                                                                                                                            | 11 |
| Proteomics                           | 240                | 1,301 Proteins                                           | 76 proteins that highly correlated with chronological age, chronic diseases and all-cause mortality                                                                                               | 12 |
| Proteomics                           | 4,263 young adults | 2,925 plasma proteins                                    | non-linear changes in the human plasma proteome with age. differential associations with proteome of age-related diseases and phenotypic traits                                                   | 13 |
| Glycan Age                           | 5,117              | 24 IgG glycosylation                                     | glycans explained variance in age considerably more than other biomarkers of age like telomere lengths. Correlation between age and predicted age is .76.                                         | 14 |
| Metabolomics                         | 44,168             | 226 metabolic biomarkers                                 | 14 biomarkers independently associating with all-cause mortality. C-statistic = 0.772 and 0.790 when looking at 5- or 10-year mortality, respectively.                                            | 15 |
| Immunological cell subsets (IMM-Age) | 135                | 73 immune-cell subsets                                   | Low and high IMM-Age have different all-cause mortality that is statistically significant ( $p = 0.018$ ).                                                                                        | 16 |
| PhotoAgeClock                        | 8,414              | High resolution pictures. visual photographic biomarkers | achieve a mean absolute error of 2.3 years in chronological age prediction                                                                                                                        | 17 |

66

67

68

69

70

71

72

73

**Supplementary Table 3. Notable aging clocks.** Extracting signatures of aging has becoming increasingly popular. Monitoring the aging process in different modalities from cellular to tissue level have produced aging clocks with varying ability to correlate the different aspects of chronological aging and healthy aging. Some of the notable aging clocks are depicted, ranging from those using a wide array of biological modalities to facial features. The current standard efforts have mostly been exploring each modality in isolation. Future attention would benefit from combining modalities to provide a more wholistic resolution on the aging process.

74  
75



77 **REFERENCES:**

- 78 1. Timmers PR, Mounier N, Lall K, Fischer K, Ning Z, Feng X, Bretherick AD, Clark DW,  
79 e QC, Agbessi M, Ahsan H, Alves I, Andiappan A, Awadalla P, Battle A, Bonder MJ, Boomsma  
80 D, Christiansen M, Claringbould A, Deelen P, van Dongen J, Esko T, Fave M, Franke L,  
81 Frayling T, Gharib SA, Gibson G, Hemani G, Jansen R, Kalnapenkis A, Kasela S, Kettunen J,  
82 Kim Y, Kirsten H, Kovacs P, Krohn K, Kronberg-Guzman J, Kukushkina V, Kutalik Z, Kahonen  
83 M, Lee B, Lehtimaki T, Loeffler M, Marigorta U, Metspalu A, van Meurs J, Milani L, Muller-  
84 Nurasyid M, Nauck M, Nivard M, Penninx B, Perola M, Pervjakova N, Pierce B, Powell J,  
85 Prokisch H, Psaty BM, Raitakari O, Ring S, Ripatti S, Rotzschke O, Rueger S, Saha A, Scholz  
86 M, Schramm K, Seppala I, Stumvoll M, Sullivan P, Teumer A, Thiery J, Tong L, Tonjes A,  
87 Verlouw J, Visscher PM, Vosa U, Volker U, Yaghootkar H, Yang J, Zeng B, Zhang F, Agbessi  
88 M, Ahsan H, Alves I, Andiappan A, Awadalla P, Battle A, Bonder MJ, Boomsma D,  
89 Christiansen M, Claringbould A, Deelen P, van Dongen J, Esko T, Fave M, Franke L, Frayling  
90 T, Gharib SA, Gibson G, Hemani G, Jansen R, Kalnapenkis A, Kasela S, Kettunen J, Kim Y,  
91 Kirsten H, Kovacs P, Krohn K, Kronberg-Guzman J, Kukushkina V, Kutalik Z, Kahonen M, Lee  
92 B, Lehtimaki T, Loeffler M, Marigorta U, Metspalu A, van Meurs J, Milani L, Muller-Nurasyid  
93 M, Nauck M, Nivard M, Penninx B, Perola M, Pervjakova N, Pierce B, Powell J, Prokisch H,  
94 Psaty BM, Raitakari O, Ring S, Ripatti S, Rotzschke O, Rueger S, Saha A, Scholz M, Schramm  
95 K, Seppala I, Stumvoll M, Sullivan P, Teumer A, Thiery J, Tong L, Tonjes A, Verlouw J,  
96 Visscher PM, Vosa U, Volker U, Yaghootkar H, Yang J, Zeng B, Zhang F, Shen X, Esko T,  
97 Kutalik Z, Wilson JF and Joshi PK. Genomics of 1 million parent lifespans implicates novel  
98 pathways and common diseases and distinguishes survival chances. *Elife*. 2019;8.
- 99 2. Zenin A, Tsepilov Y, Sharapov S, Getmantsev E, Menshikov LI, Fedichev PO and  
100 Aulchenko Y. Identification of 12 genetic loci associated with human healthspan. *Commun Biol*.  
101 2019;2:41.
- 102 3. Hannum G, Guinney J, Zhao L, Zhang L, Hughes G, Sada S, Klotzle B, Bibikova M,  
103 Fan JB, Gao Y, Deconde R, Chen M, Rajapakse I, Friend S, Ideker T and Zhang K. Genome-  
104 wide methylation profiles reveal quantitative views of human aging rates. *Mol Cell*.  
105 2013;49:359-367.
- 106 4. Horvath S. DNA methylation age of human tissues and cell types. *Genome Biol*.  
107 2013;14:R115.
- 108 5. Horvath S. Erratum to: DNA methylation age of human tissues and cell types. *Genome*  
109 *Biol*. 2015;16:96.
- 110 6. Levine ME, Lu AT, Quach A, Chen BH, Assimes TL, Bandinelli S, Hou L, Baccarelli  
111 AA, Stewart JD, Li Y, Whitsel EA, Wilson JG, Reiner AP, Aviv A, Lohman K, Liu Y, Ferrucci  
112 L and Horvath S. An epigenetic biomarker of aging for lifespan and healthspan. *Aging (Albany*  
113 *NY)*. 2018;10:573-591.
- 114 7. Lu AT, Quach A, Wilson JG, Reiner AP, Aviv A, Raj K, Hou L, Baccarelli AA, Li Y,  
115 Stewart JD, Whitsel EA, Assimes TL, Ferrucci L and Horvath S. DNA methylation GrimAge  
116 strongly predicts lifespan and healthspan. *Aging (Albany NY)*. 2019;11:303-327.
- 117 8. Peters MJ, Joehanes R, Pilling LC, Schurmann C, Conneely KN, Powell J, Reinmaa E,  
118 Sutphin GL, Zernakova A, Schramm K, Wilson YA, Kobes S, Tukiainen T, Consortium NU,  
119 Ramos YF, Goring HH, Fornage M, Liu Y, Gharib SA, Stranger BE, De Jager PL, Aviv A, Levy  
120 D, Murabito JM, Munson PJ, Huan T, Hofman A, Uitterlinden AG, Rivadeneira F, van Rooij J,  
121 Stolk L, Broer L, Verbiest MM, Jhamai M, Arp P, Metspalu A, Tserel L, Milani L, Samani NJ,

122 Peterson P, Kasela S, Codd V, Peters A, Ward-Caviness CK, Herder C, Waldenberger M, Roden  
 123 M, Singmann P, Zeilinger S, Illig T, Homuth G, Grabe HJ, Volzke H, Steil L, Kocher T, Murray  
 124 A, Melzer D, Yaghoobkar H, Bandinelli S, Moses EK, Kent JW, Curran JE, Johnson MP,  
 125 Williams-Blangero S, Westra HJ, McRae AF, Smith JA, Kardia SL, Hovatta I, Perola M, Ripatti  
 126 S, Salomaa V, Henders AK, Martin NG, Smith AK, Mehta D, Binder EB, Nylocks KM,  
 127 Kennedy EM, Klengel T, Ding J, Suchy-Dicey AM, Enquobahrie DA, Brody J, Rotter JI, Chen  
 128 YD, Houwing-Duistermaat J, Kloppenburg M, Slagboom PE, Helmer Q, den Hollander W, Bean  
 129 S, Raj T, Bakhshi N, Wang QP, Oyston LJ, Psaty BM, Tracy RP, Montgomery GW, Turner ST,  
 130 Blangero J, Meulenbelt I, Ressler KJ, Yang J, Franke L, Kettunen J, Visscher PM, Neely GG,  
 131 Korstanje R, Hanson RL, Prokisch H, Ferrucci L, Esko T, Teumer A, van Meurs JB and Johnson  
 132 AD. The transcriptional landscape of age in human peripheral blood. *Nat Commun.* 2015;6:8570.  
 133 9. Mamoshina P, Volosnikova M, Ozerov IV, Putin E, Skibina E, Cortese F and  
 134 Zhavoronkov A. Machine Learning on Human Muscle Transcriptomic Data for Biomarker  
 135 Discovery and Tissue-Specific Drug Target Identification. *Front Genet.* 2018;9:242.  
 136 10. Huan T, Chen G, Liu C, Bhattacharya A, Rong J, Chen BH, Seshadri S, Tanriverdi K,  
 137 Freedman JE, Larson MG, Murabito JM and Levy D. Age-associated microRNA expression in  
 138 human peripheral blood is associated with all-cause mortality and age-related traits. *Aging Cell.*  
 139 2018;17.  
 140 11. Menni C, Kiddle SJ, Mangino M, Vinuela A, Psatha M, Steves C, Sattlecker M, Buil A,  
 141 Newhouse S, Nelson S, Williams S, Voyle N, Soininen H, Kloszewska I, Mecocci P, Tsolaki M,  
 142 Vellas B, Lovestone S, Spector TD, Dobson R and Valdes AM. Circulating Proteomic  
 143 Signatures of Chronological Age. *J Gerontol A Biol Sci Med Sci.* 2015;70:809-16.  
 144 12. Tanaka T, Biancotto A, Moaddel R, Moore AZ, Gonzalez-Freire M, Aon MA, Candia J,  
 145 Zhang P, Cheung F, Fantoni G, consortium CHI, Semba RD and Ferrucci L. Plasma proteomic  
 146 signature of age in healthy humans. *Aging Cell.* 2018;17:e12799.  
 147 13. Lehallier B, Gate D, Schaum N, Nanasi T, Lee SE, Yousef H, Moran Losada P, Berdnik  
 148 D, Keller A, Verghese J, Sathyan S, Franceschi C, Milman S, Barzilai N and Wyss-Coray T.  
 149 Undulating changes in human plasma proteome profiles across the lifespan. *Nat Med.*  
 150 2019;25:1843-1850.  
 151 14. Kristic J, Vuckovic F, Menni C, Klaric L, Keser T, Beceheli I, Pucic-Bakovic M,  
 152 Novokmet M, Mangino M, Thaqi K, Rudan P, Novokmet N, Sarac J, Missoni S, Kolcic I,  
 153 Polasek O, Rudan I, Campbell H, Hayward C, Aulchenko Y, Valdes A, Wilson JF, Gornik O,  
 154 Primorac D, Zoldos V, Spector T and Lauc G. Glycans are a novel biomarker of chronological  
 155 and biological ages. *J Gerontol A Biol Sci Med Sci.* 2014;69:779-89.  
 156 15. Deelen J, Kettunen J, Fischer K, van der Spek A, Trompet S, Kastenmuller G, Boyd A,  
 157 Zierer J, van den Akker EB, Ala-Korpela M, Amin N, Demirkan A, Ghanbari M, van Heemst D,  
 158 Ikram MA, van Klinken JB, Mooijaart SP, Peters A, Salomaa V, Sattar N, Spector TD, Tiemeier  
 159 H, Verhoeven A, Waldenberger M, Wurtz P, Davey Smith G, Metspalu A, Perola M, Menni C,  
 160 Geleijnse JM, Drenos F, Beekman M, Jukema JW, van Duijn CM and Slagboom PE. A  
 161 metabolic profile of all-cause mortality risk identified in an observational study of 44,168  
 162 individuals. *Nat Commun.* 2019;10:3346.  
 163 16. Alpert A, Pickman Y, Leipold M, Rosenberg-Hasson Y, Ji X, Gaujoux R, Rabani H,  
 164 Starosvetsky E, Kveler K, Schaffert S, Furman D, Caspi O, Rosenschein U, Khatri P, Dekker  
 165 CL, Maecker HT, Davis MM and Shen-Orr SS. A clinically meaningful metric of immune age  
 166 derived from high-dimensional longitudinal monitoring. *Nat Med.* 2019;25:487-495.

167 17. Bobrov E, Georgievskaya A, Kiselev K, Sevastopolsky A, Zhavoronkov A, Gurov S,  
168 Rudakov K, Del Pilar Bonilla Tobar M, Jaspers S and Clemann S. PhotoAgeClock: deep  
169 learning algorithms for development of non-invasive visual biomarkers of aging. *Aging (Albany*  
170 *NY)*. 2018;10:3249-3259.

171

172

173

174

175

176

177

178

179

180

181

182

183

184

185

186

187

188

189

190

191

192  
193  
194
